# Supplementary material for: Carbon Nanotubes Improved the Germination and Vigor of Plant Species from Peatland Ecosystem Via Remodeling the Membrane Lipidome
Source: MDPI journal article supplement (doi:10.3390/nano10091852), 2020-09-16
Supplement: s1 [file s1]

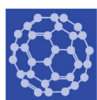

# Carbon Nanotubes Improved the Germination and Vigor of Plant Species from Peatland Ecosystem Via Remodeling the Membrane Lipidome

Md. Hossen Ali <sup>1</sup>, Jean-Marie Sobze <sup>2</sup>, Thu Huong Pham <sup>1</sup>, Muhammad Nadeem <sup>1,\*</sup>, Chen Liu <sup>1</sup>, Lakshman Galagedara <sup>1</sup>, Mumtaz Cheema <sup>1</sup> and Raymond Thomas <sup>1,\*</sup>

<sup>1</sup> School of Science and the Environment/Boreal Ecosystem Research Facility, Grenfell Campus, Memorial University of Newfoundland, Corner Brook, NL A2H 5G5, Canada; mhali@grenfell.mun.ca (M.H.A.); tpham@grenfell.mun.ca (T.H.P.); cliu@grenfell.mun.ca (C.L.); lgalagedara@grenfell.mun.ca (L.G.); mcheema@grenfell.mun.ca (M.C.)

<sup>2</sup> Northern Alberta Institute of Technology, Boreal Research Institute, 8102-99 Avenue, Peace River, AB T8S 1R2, Canada; jeanmars@nait.ca

\* Correspondence: muha.nadeem@gmail.com (M.N.); rthomas@grenfell.mun.ca (R.T.)

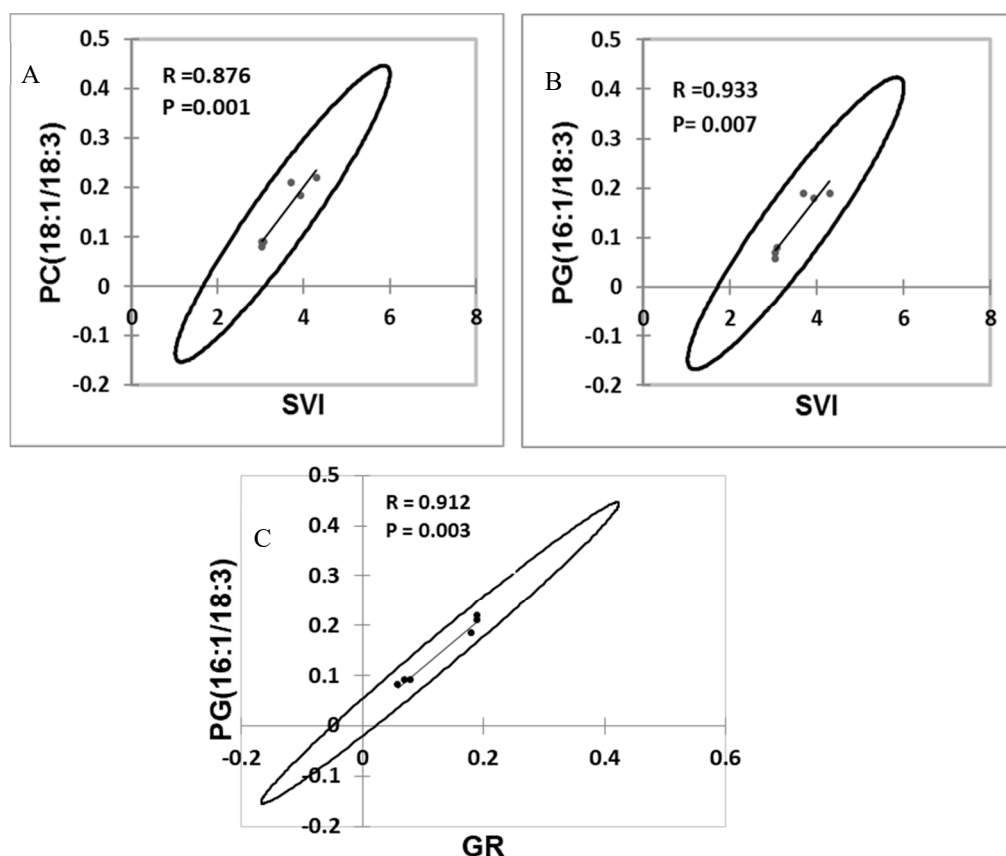

**Figure S1.** Correlations between lipid molecular species, seedling vigor index (A,B) and seed germination (C). Correlation done for only R1, R2, and R3 of MWCNT-COOH treatments of both bog birch and Labrador tea and only means are presented. R = Pearson's correlation coefficient, p = alpha at 0.05. n = 100 plants per treatment. SVI = Seedling vigor index, GR = germination rate, PG = phosphatidyl glycerol, PC = phosphatidylcholine.

**Table S1.** Lipid molecular species clustered in the same quadrants as MWCNT-COOH, SVI and GR following RDA analysis, but are not significantly correlated following Pearson correlation analysis. N = 100 plants per treatment.

| <b>Labrador tea</b>          |                              |
|------------------------------|------------------------------|
| <b>Name of lipid Classes</b> | <b>Level of significance</b> |
| PI (16:0/18:2)               | NS                           |
| PC(18:3/18:3)                | NS                           |
| PC(18:3/18:2)                | NS                           |
| PA(18:3/18:2)                | NS                           |
| DGDG(16:0/18:3)              | NS                           |
| LPC (18:2)                   | NS                           |
| DGDG(18:3/18:3)              | NS                           |

**Table S2.** Lipid molecular species clustered in the same quadrants as MWCNT-COOH, SVI and GR following RDA analysis, but are not significantly correlated following Pearson correlation analysis. N = 100 plants per treatment.

| <b>Bog birch</b>             |                              |
|------------------------------|------------------------------|
| <b>Name of lipid Classes</b> | <b>Level of significance</b> |
| PI (16:0/18:3)               | NS                           |
| PA(18:1/18:2)                | NS                           |
| LPC (18:3)                   | NS                           |
| PE (16:0/18:2)               | NS                           |
| DGDG(18:3/18:3)              | NS                           |
